# Supplementary material
Source: Research Square preprint supplement (doi:10.21203/rs.3.rs-10250782/v1)
Supplement: Supplementary file 1 [file 3e2c400f4ca68a8bd2ae3580.docx]

**Comparative Study of the Regulatory Effects of Dual-Pillar Policies on Housing Prices: A DSGE-Based Policy Simulation Analysis**

**Funding：**

This work was supported by grants from the National Natural Science Foundation of China [number: 72204002; 72374003]; Outstanding Youth Research Project for Universities in Anhui Province [number: 2023AHO20021]; National Key Research and Development Program of China [number: 2024YFC3807800]; Department of Natural Resources of Anhui Province [number: 2025-K-19].

**Ethical Approval：**

Not applicable. This study does not involve human participants, animals, clinical data, experiments, surveys, interviews, or any identifiable personal information requiring review by an ethics committee. The analysis is based solely on secondary and/or publicly available aggregate or firm-level data. Therefore, ethical approval was not required for this study.
