# Supplementary material
Source: Research Square preprint supplement (doi:10.21203/rs.3.rs-10250782/v1)
Supplement: Supplementary file 2 [file 627cb5b73cfbd4d52feb5ace.docx]

Highlights：

1. This study builds a three-sector DSGE model embedded with dual-pillar policy rules to compare the heterogeneous regulatory effects of monetary and macroprudential policies on housing prices.

2. Variance decomposition shows that monetary policy shocks dominate housing price volatility (65.951%) and account for 99.060% of household consumption fluctuations.

3. The policy loss function confirms that monetary policy generates far higher comprehensive losses, whereas macroprudential policy has lower spillover costs and stronger sectoral targeting.

4. Dual-pillar policies function as a complementary regulatory architecture rather than simple substitutes, with differentiated functional orientations.

5. Over-intensified housing-price-targeted LTV adjustment elevates overall policy losses, and optimal coordination demands dynamic division of labor by shock sources.
